# Supplementary material
Source: PubMed Central journal article supplement (PMC5096889)
Supplement: NIHMS782951-supplement-Supplementary.pdf [file NIHMS782951-supplement-Supplementary.pdf]

## Materials and Methods

### Patient samples

The patients provided informed consent to collect blood and marrow for research in accordance with the Declaration of Helsinki and the Belmont Report. The University of Utah Institutional Review Board approved the protocol (IRB #45880). Peripheral blood (PB) and BM samples were obtained both at initial diagnosis and on imatinib treatment as detailed in [Supplementary Table 1](#). Mononuclear cells (MNCs) were isolated from PB or BM by density gradient separation. CD34<sup>+</sup>, CD14<sup>+</sup>, and CD3<sup>+</sup> cells were enriched by AutoMACS magnetic beads (Miltenyi, Auburn, CA). Sorted cell fractions were confirmed to be >90% pure by fluorescence-activated cell sorting (FACS).

### Whole exome sequencing

DNA exome enrichment was performed using the SureSelect Human All Exon + UTR (v5) Kit (Agilent Santa Clara, CA). Enriched exomes were sequenced on an Illumina HiSeq 2500 sequencer, as described<sup>6</sup>.

### Sequenom MassARRAY

Further validation of the detected mutations in serial samples was performed using the MassARRAY platform (Sequenom, San Diego, CA). Briefly, multiplexed PCR was initially performed using Sequenom's iPLEXPro chemistry. The PCR contained: 0.8  $\mu$ L H<sub>2</sub>O (molecular biology grade), 0.5  $\mu$ L PCR buffer, 0.4  $\mu$ L 25 mM MgCl<sub>2</sub>, 0.1  $\mu$ L 25 mM dNTPs, 0.2  $\mu$ L PCR enzyme (5 U/ $\mu$ L), 1  $\mu$ L multiplexed primer mix ([Supplementary Table 4](#)), and 2  $\mu$ L DNA 10 ng/ $\mu$ L in Tris-EDTA. PCR was performed with a Mastercycler ProS (Eppendorf), using the following conditions: denaturation at 95°C for 2 minutes followed by 45 cycles of 95°C for 30 seconds, 56°C for 30 seconds, and 72°C for 1 minute, followed by 72°C for 5 minutes. The PCR products were treated with a cocktail of 1.53  $\mu$ L H<sub>2</sub>O, 0.17  $\mu$ L 10 $\times$  SAP Buffer and 0.3  $\mu$ L shrimp alkaline phosphatase (1.7 U/ $\mu$ L) (SAP) in a thermal cycler at 37°C for 40 minutes followed by 85°C for 5 minutes. The extend PCR contained 7  $\mu$ L SAP treated PCR products, 0.62  $\mu$ L H<sub>2</sub>O, 0.2  $\mu$ L 10 $\times$  iPLEX buffer, 0.2  $\mu$ L 10 $\times$  Termination Mix, 0.041  $\mu$ L Thermo Sequenase (5 U/ $\mu$ L) and 0.94  $\mu$ L of the multiplexed extend primer mix. The extend PCR was performed in a thermal cycler,

using the following conditions: denaturation at 95°C for 30 seconds followed by 40 cycles of 95°C for 5 seconds, 52°C for 5 seconds, 80°C for 5 seconds (the 52 and 80°C steps were repeated 5 times), followed by 72°C for 3 minutes. A total of 41 µL of molecular grade water and ion exchange resin was added to each sample. The plate was rotated for approximately 30 minutes and centrifuged at 4000 rpm for 5 minutes. Samples were spotted on the SpectroCHIP II G96 using the MassARRAY Nanodispenser. Results were visualized on the MassARRAY analyzer 4 system, using the autorun settings. Data was analyzed using Sequenom Typer version 4.0.

### **Sanger sequencing**

Four mutations were further validated by amplification of the target region followed by Sanger sequencing. Primers were designed using Primer3Web version 4.0.0 ([Supplementary Table 5](#)).

### **Colony genotyping**

CD34<sup>+</sup> cells from samples at diagnosis, day 67 and day 78 after starting imatinib were suspended in MethoCult™ H4230 (StemCell Technologies) in the presence of Stem Span CC100 (StemCell Technologies, Vancouver, BC), 10ng/ml GM-CSF (Miltenyi) and 10ng/ml G-CSF (Amgen, USA). After 2 weeks, at least 100 individual colonies were picked from each sample. DNA and RNA were extracted using the AllPrep DNA/RNA Micro kit (Qiagen). RNA was converted to cDNA using the iScript cDNA Synthesis Kit (Bio-Rad, Hercules, CA). The cDNA from each colony was used for detection of the *BCR-ABL1* transcripts by real-time quantitative PCR (RT-qPCR), using glucuronidase b (*GUSB*) as the housekeeping gene<sup>7,8</sup>.

### **Quantitation of mutant alleles by pyrosequencing**

Primers for amplification and sequencing of the mutant alleles were designed using QIAGEN PyroMark Assay Design software ([Supplementary Table 6](#)). The amplified fragments were subjected to pyrosequencing in accordance with manufacturer's instructions in PyroMark Q24 (Pyrosequencing Qiagen, Germany). The percentages of mutant and non-mutated alleles were determined by the Allele Quantitation Algorithm using PyroMark Q24 Software version 2.0.7.

**Bioinformatics**

Fastq files generated by the Illumina HiSeq 2500 sequencer were aligned to the human genome (build 37) with Novoalign (version 2.08.01); potential PCR duplicates were eliminated following standard GATK protocols (version 3.3-2). Samtools (version 1.0) was used to generate mpileup files, and VarScan 2 (version 2.3.7) was used to call variants. Three population databases (1000 genomes, NHLBI 6500, and UCSC genome browser) were used to cull SNPs found to occur at >1 in 500 alleles in any of these databases. Annovar was used to annotate mutations. Non-exonic mutations (except for splice-site mutations) were filtered out<sup>9</sup>.

**Supplementary Table 1. Clinical and Laboratory Parameters**

|                                    | Diagnosis | Day 67   | Day 78   | Day 92           | Day 124                 |
|------------------------------------|-----------|----------|----------|------------------|-------------------------|
| Disease status                     | CML-AP    | CML-AP   | CML-AP   | CMML-1           | CMML-1                  |
| Treatment                          | None      | Imatinib | Imatinib | Imatinib, hydrea | Imatinib, 5-azacytidine |
| WBC count (10 <sup>3</sup> /μL)    | 270       | 19       | 15       | 73               | 21                      |
| Segmented neutrophils (%)          | 33        | 66       | 56       | 63               | 72                      |
| Bands (%)                          | 19        | 1        | 0        | 10               | 0                       |
| Metamyelocytes (%)                 | 5         | 0        | 1        | 5                | 0                       |
| Myelocytes (%)                     | 42        | 0        | 0        | 2                | 0                       |
| Promyelocytes (%)                  | 1         | 0        | 0        | 0                | 0                       |
| Myeloblasts (%)                    | 0         | 0        | 0        | 0                | 0                       |
| Basophils (%)                      | 0         | 1        | 2        | 0                | 0                       |
| Eosinophils (%)                    | 0         | 0        | 0        | 0                | 0                       |
| Monocytes (%)                      | 0         | 23       | 26       | 19               | 16                      |
| Lymphocytes (%)                    | 0         | 9        | 15       | 1                | 12                      |
| Hemoglobin (g/dL)                  | 9         | 8.8      | 8.7      | 9                | 9                       |
| Platelets (10 <sup>3</sup> /μL)    | 55        | 87       | 82       | 80               | 90                      |
| Cytogenetics (Ph <sup>+</sup> met) | 100%      | NA       | NA       | 0%               | NA                      |
| BM blast count (%)                 | 1.1       | NA       | NA       | 2.7              | NA                      |
| PB blast count (%)                 | 0         | 0        | 0        | 0                | 0                       |
| BCR-ABL1 % (IS)                    | 10.1%     | 1.8      | NA       | 0.12             | NA                      |

NA – not available

**Supplementary Table 2. Somatic SNVs Detected by WES on Day 92**

| Gene  | Chromosome | Position  | Ref | Variant | Amino Acid Exchange | COSMIC ID |
|-------|------------|-----------|-----|---------|---------------------|-----------|
| EZH2  | 7          | 148506219 | T   | C       | I669M               | 1448968   |
| KRAS  | 12         | 25398285  | C   | G       | G12R                | 516       |
| MSLN  | 16         | 816896    | C   | A       | P462H               | NR        |
| NTRK3 | 15         | 88669547  | C   | T       | V443I               | NR        |

NR – not reported

**Supplementary Table 3. Sequenom MassARRAY Analysis**

| Gene  | Ch | Position    | W | V   | Mononuclear cells      |      |           |      |        |      |        |      |        |      |         |      |
|-------|----|-------------|---|-----|------------------------|------|-----------|------|--------|------|--------|------|--------|------|---------|------|
|       |    |             |   |     | CD3 <sup>+</sup> Cells |      | Diagnosis |      | Day 67 |      | Day 78 |      | Day 92 |      | Day 124 |      |
|       |    |             |   |     | WT                     | Var  | WT        | Var  | WT     | Var  | WT     | Var  | WT     | Var  | WT      | Var  |
| ASXL1 | 20 | 20031022937 | C | Del | 0.52                   | 0.47 | 0.5       | 0.5  | 0.5    | 0.5  | 0.49   | 0.51 | 0.5    | 0.5  | 0.44    | 0.56 |
| EZH2  | 7  | 7148506219  | T | C   | 1                      | 0    | 1         | 0    | 0.81   | 0.19 | 0.82   | 0.18 | 0.76   | 0.24 | 0.75    | 0.25 |
| KRAS  | 12 | 12025398285 | C | G   | 1                      | 0    | 1         | 0    | 0.76   | 0.24 | 0.82   | 0.18 | 0.63   | 0.37 | 0.57    | 0.43 |
| MSLN  | 16 | 16000816896 | C | A   | 1                      | 0    | 1         | 0    | 0.82   | 0.19 | 0.9    | 0.1  | 0.77   | 0.23 | 0.74    | 0.26 |
| NTRK3 | 15 | 15088669547 | C | T   | 1                      | 0    | 1         | 0    | 0.67   | 0.33 | 0.8    | 0.2  | 0.6    | 0.4  | 0.6     | 0.4  |
| TET2  | 4  | 4106156316  | T | Del | 0.74                   | 0.26 | 0.73      | 0.27 | 0.73   | 0.27 | 0.73   | 0.27 | 0.68   | 0.32 | 0.72    | 0.28 |
| TET2  | 4  | 4106196599  | A | Del | 0.5                    | 0.5  | 0.49      | 0.51 | 0.53   | 0.47 | 0.48   | 0.52 | 0.48   | 0.52 | 0.48    | 0.52 |

Ch - chromosome; W - wild type nucleotide; V - variant nucleotide; WT - wild type allele; Var - variant allele.

**Supplementary Table 4. Sequences of Sequenom Primers**

| Gene    | Ch | Position    | Forward PCR Primer Sequence    | Reverse PCR Primer Sequence     | Extend PCR Primer Sequence |
|---------|----|-------------|--------------------------------|---------------------------------|----------------------------|
| FAT3    | 11 | 11092534968 | ACGTTGGATGTGACAATGCACCAGTCTTCG | ACGTTGGATGTAACGTCGGATGTGTCTCTG  | CGCGCAGGAAGTGTACC          |
| TET2    | 4  | 4106156316  | ACGTTGGATGGATTCTTTCTGCCACTAC   | ACGTTGGATGCTGAGGAACCTGTGGAAGAG  | CCATCACAATTGCTTCTT         |
| MKL1    | 22 | 22040815309 | ACGTTGGATGACAGGGCTGATTTGGTCTTG | ACGTTGGATGAGCTGAAGTTGCGATCACTG  | GAGCTGATTGAGCGCCTTC        |
| FAT1    | 4  | 4187525083  | ACGTTGGATGCGGATAGATGCTCTCCTCAA | ACGTTGGATGGGCAGATAATGGAAAGCCTC  | GCTCTCCTCAATTACCCTAA       |
| EZH2    | 7  | 7148506219  | ACGTTGGATGAAAACAGCTCTTCGCCAGTC | ACGTTGGATGGCAGTTATGATGTTAACGG   | GGCTCTTGGCAAAAATACC        |
| TET2    | 4  | 4106196599  | ACGTTGGATGGAACCTATCAGTGGACAAC  | ACGTTGGATGACCTATACAGATCCATCGGC  | GGGAGAATAGGAACCCAGATA      |
| NTRK3   | 15 | 15088669547 | ACGTTGGATGTGGACCGTCGACCATAATTG | ACGTTGGATGGGTATCCATAGCAGTTGGAC  | GTGTCCTGTTGGTGGTCTCTTC     |
| ZNF521  | 18 | 18022902100 | ACGTTGGATGACAGCTTCGTCTCCAATC   | ACGTTGGATGAAGACTGAAGATGGAGAGGC  | TGAAGATGGAGAGGCACTAGATT    |
| FAT1    | 4  | 4187539216  | ACGTTGGATGCCACACTTTGTGACTGATCC | ACGTTGGATGGTAATTCAGATCAGGGCATC  | CTGACTCAGGAACCAAC          |
| GATA5   | 20 | 20061050495 | ACGTTGGATGACAGGTAGGACAGCATCGAG | ACGTTGGATGTACGCCGACTCGGGCTCCTT  | ACAAACATCGGAGAGCCG         |
| KRAS    | 12 | 12025398285 | ACGTTGGATGGCTGTATCGTCAAGGCACTC | ACGTTGGATGAGGCTGTGAAAATGACTG    | ACTTGTGGTAGTTGGAGCT        |
| UBE2S   | 19 | 19055912995 | ACGTTGGATGGTCGGTGGAGGAAGCTTCA  | ACGTTGGATGTCTGCTCACAGATCCACG    | TTCGGCCCTGCCGCTGGGCC       |
| ERCC4   | 16 | 16014015921 | ACGTTGGATGCTGCCCTGTATTAATAGCC  | ACGTTGGATGTCAATTTGTTACACGGCGAGG | AATCAGCTGAAGATAGAAGGA      |
| METTL13 | 1  | 1171752976  | ACGTTGGATGTGTATGATGTGGGCTATCGG | ACGTTGGATGGGGTGGCATTACATTCCTTC  | TTACATTCCTTATTGCTTGA       |
| MYC     | 8  | 8128753155  | ACGTTGGATGTCTGAAGAGGACTTGTTCG  | ACGTTGGATGCAAGAGTCCGTAGCTGTTT   | AGAGGACTTGTTCGGAAACGAC     |
| ALK     | 2  | 2029448423  | ACGTTGGATGAGAGAGGATCAGCGAGAGTG | ACGTTGGATGTGGTGTGGTGTCAATACCC   | TGGGACCTGTCTCCAGTGCACCC    |
| MSLN    | 16 | 16000816896 | ACGTTGGATGCTACTGTCCACCACCGTGT  | ACGTTGGATGTTGGATAGAGGACGTCCAG   | ACGTGTCCAGGTCTCTGG         |
| BDNF    | 11 | 11027681197 | ACGTTGGATGTCTAGCTAAGAAAGCTCAAC | ACGTTGGATGAGTAGGATAAACTCAGAGCG  | TGTGTGTGTGTGTGTGTG         |
| TCF3    | 19 | 19001627417 | ACGTTGGATGTCTCCGAAGGAGGCATAG   | ACGTTGGATGTCCCACTAACCTCTCTCTC   | TCCCTTGCAGGCAAGAGC         |
| ASXL1   | 20 | 20031022937 | ACGTTGGATGGAAGTGAATGTGAGTCTGGC | ACGTTGGATGGAGACAGAATGGGACCATTTG | AATGGGACCATTGTCTGCAG       |
| MLL3    | 7  | 7151945334  | ACGTTGGATGAGAGTCCATCAATCCAGTAG | ACGTTGGATGATGCTGAGGAACAGTTGG    | CAATCCAGTAGAAAGTTCAGAAT    |
| ABL2    | 1  | 1179086420  | ACGTTGGATGCTGAACATCGTAAGAGAAGC | ACGTTGGATGGGGTAAGGTTGAAAGGGAC   | TCTGTGCTATTTATTTTTTTTTT    |

**Supplementary Table 5: Sequences of Primers for Sanger Sequencing**

| Primer ID | Sequence                |
|-----------|-------------------------|
| EZH2-F    | CATGGCAAAGTGACCCATCA    |
| EZH2-R    | ACTCCCTTTTCAGTCCTGTGA   |
| KRAS-F    | GGCCTGCTGAAAATGACTGA    |
| KRAS-R    | TGTATCAAAGAATGGTCCTGCAC |
| MSLN-F    | GACACCCTAGACACCCTGAC    |
| MSLN-R    | CCTTGGGATAGAGGACGTCC    |
| NTRK3-F   | TCTCAGAGAGCAATGGGAGA    |
| NTRK3-R   | TGCAGTTCTGAGAAGGCTACA   |

**Supplementary Table 6: Sequences of Primers for Pyrosequencing**

| Primer ID              | Sequence                 |
|------------------------|--------------------------|
| EZH2-F                 | AAACAGCTCTTCGCCAGTCT     |
| EZH2-R (Biotinylated)  | CAGTGTGTCTCTTTGCAGTTATGA |
| EZH2-S                 | CTCTTGGCAAAAATACC        |
| KRAS-F                 | TATTCGTCCACAAAATGATTCTGA |
| KRAS-R (Biotinylated)  | TATAAGGCCTGCTGAAAATGACT  |
| KRAS-S                 | CTCTTGCCTACGCCA          |
| MSLN-F                 | AACTCTGCCCCGGAAGGTG      |
| MSLN-R (Biotinylated)  | CCCAGGAAGGACTGGATCTTCA   |
| MSLN-S                 | CCAGGGCGGTCAGGC          |
| NTRK3-F (Biotinylated) | AAATTTGGACCGTCGACCATA    |
| NTRK3-R                | CTTGCTGCTTTTGCCTGTGT     |
| NTRK3-S                | CCTGTTGGTGGTTCTC         |
